# Supplementary material for: Profiling the Mismatch Tolerance of Argonaute 2 through Deep Sequencing of Sliced Polymorphic Viral RNAs
Source: PubMed Central journal article supplement (PMC5602524; doi:10.1016/j.omtn.2017.08.010), 2017-08-24
Supplement: mmc1.pdf [file mmc1.pdf]

OMTN, Volume 9

## Supplemental Information

### Profiling the Mismatch Tolerance of Argonaute 2 through Deep Sequencing of Sliced Polymorphic Viral RNAs

Pantazis I. Theotokis, Louise Usher, Christopher K. Kortschak, Ed  
Schwalbe, and Sterghios A. Moschos

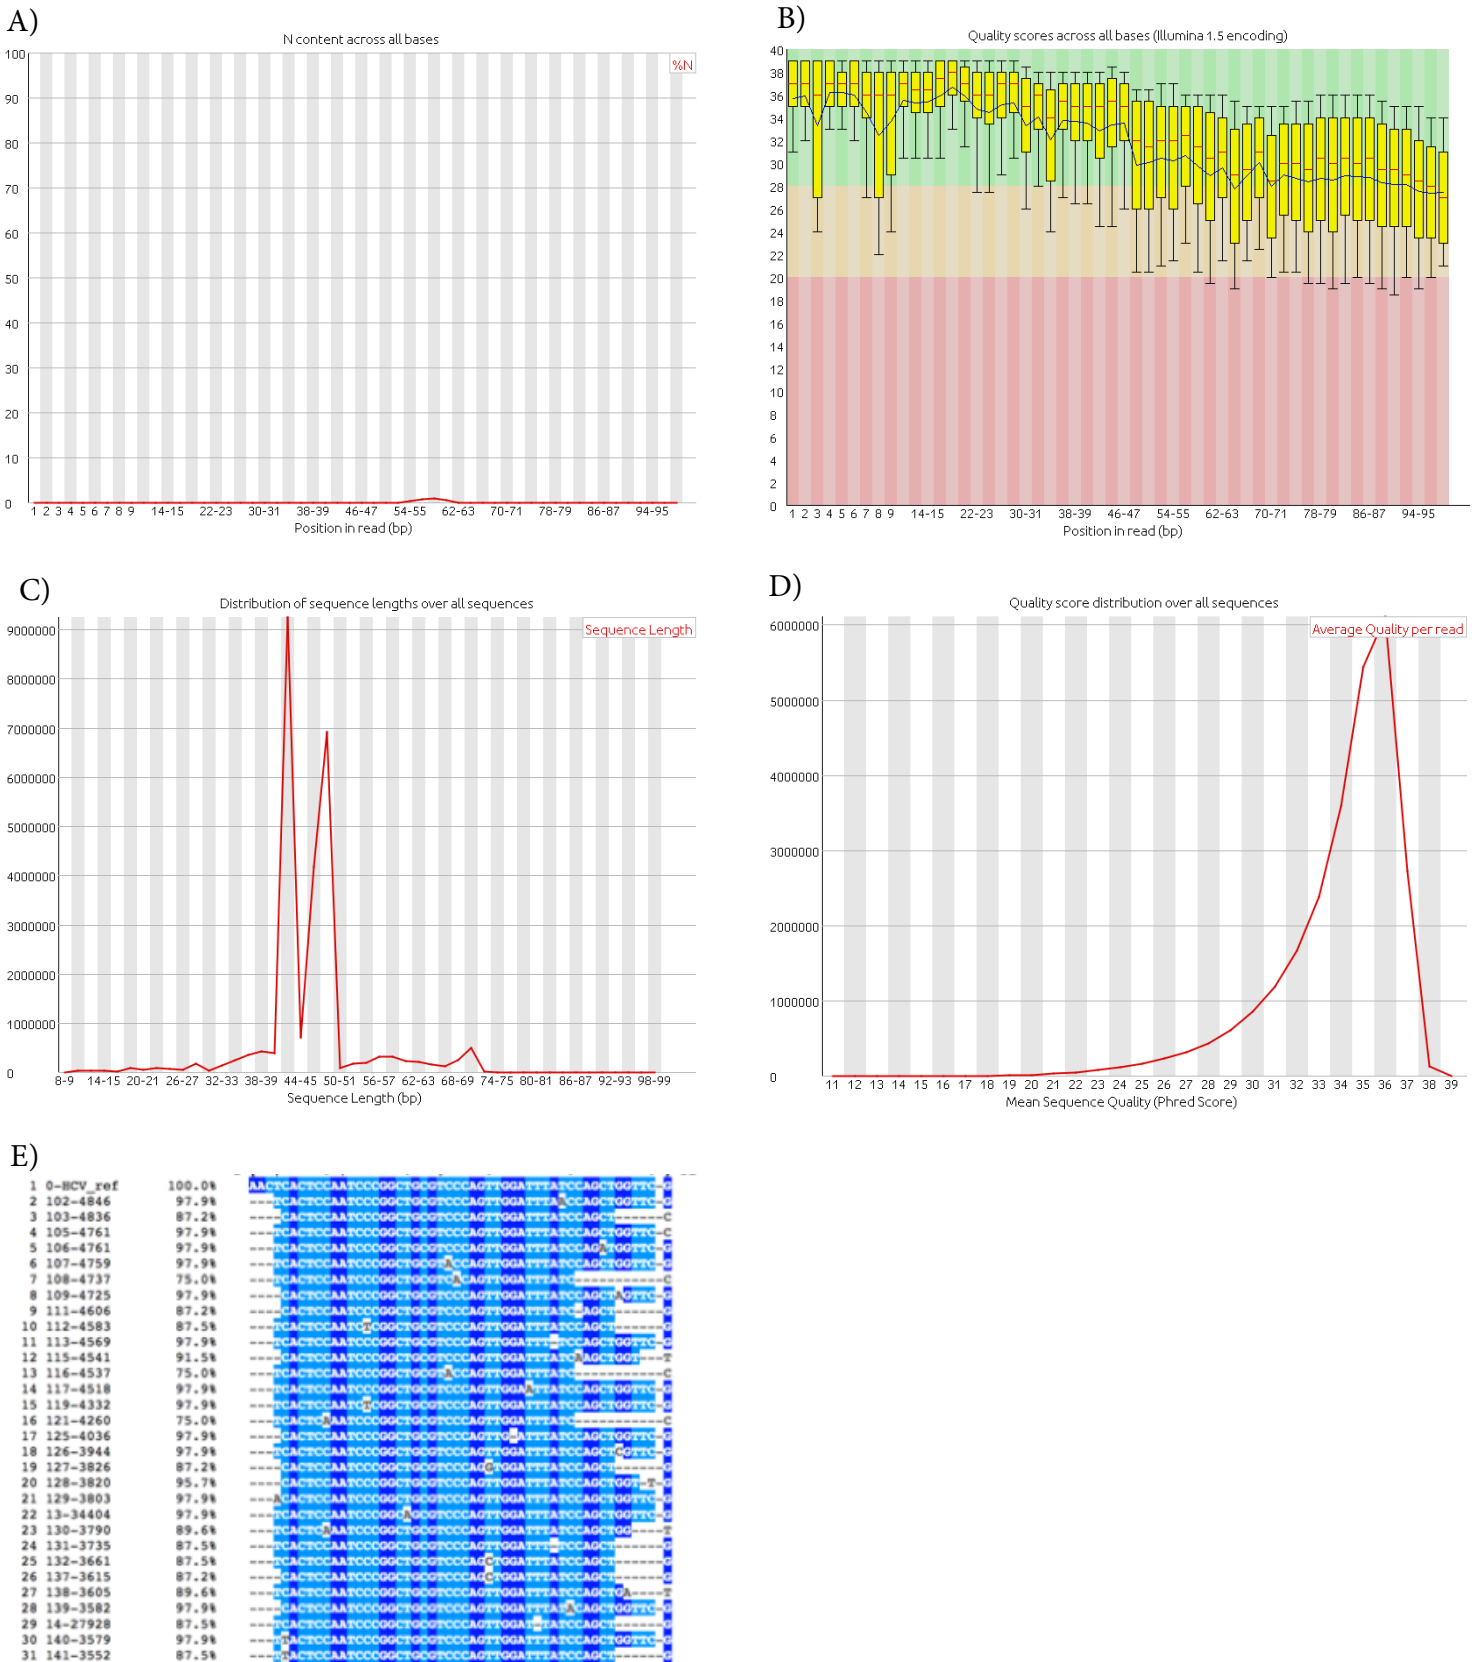

**Supplemental Figure 1.** FastQC Quality Control report output excerpt after 5' RACE adapter trimming using Cutadapt and visualisation of the nature of unaligned reads. A) Limited incidence of unresolved bases (N content) across the RACE-SEQ reads. B) Per base PHRED Quality score distribution does not fall under Q20 in 5' RACE adapter-treated reads. C) Trimmed read size distribution profile. D) Read PHREAD score distribution across all reads after RNA adapter trimming. E) Visualising in MView a T-Coffee multiple sequence alignment of collapsed 5' RACE SEQ reads indicates that a large fraction of reads might be arising from HCV quasi-species featuring insertions, deletions and mutations (Purines in dark blue, pyrimidines in light blue)

## Supplemental Table 1. Extended Cutadapt summary report following RACE adapter removal.

```
biolinux@E-Laptop-38[NEW_old] cutadapt -gGGACTGACATGGACTGAAGGAGTAGAAA -e0 --no-indels -m10 --discard-untrimmed -o trimmed_009.fastq.gz siRNA_009.fastq.gz
This is cutadapt 1.10 with Python 2.7.6
Command line parameters: -gGGACTGACATGGACTGAAGGAGTAGAAA -e0 --no-indels -m10 --discard-untrimmed -o trimmed_009.fastq.gz siRNA_009.fastq.gz
Trimming 1 adapter with at most 0.0% errors in single-end mode ...
Finished in 1351.46 s (22 us/read; 2.77 M reads/minute).
```

=== Summary ===

```
Total reads processed:          62,334,988
Reads with adapters:           26,412,283 (42.4%)
Reads that were too short:      609,109 (1.0%)
Reads written (passing filters): 26,238,713 (42.1%)
```

```
Total basepairs processed: 4,598,424,045 bp
Total written (filtered): 1,203,983,899 bp (26.2%)
```

=== Adapter 1 ===

Sequence: GGACTGACATGGACTGAAGGAGTAGAAA; Type: regular 5'; Length: 30; Trimmed: 26412283 times.

No. of allowed errors:  
0-30 bp: 0

### Overview of removed sequences

| length | count | expect   | max.err | error counts |
|--------|-------|----------|---------|--------------|
| 3      | 18777 | 973984.2 | 0       | 18777        |
| 4      | 7404  | 243496.0 | 0       | 7404         |
| 5      | 2050  | 60874.0  | 0       | 2050         |
| 6      | 593   | 15218.5  | 0       | 593          |
| 7      | 380   | 3804.6   | 0       | 380          |
| 8      | 290   | 951.2    | 0       | 290          |
| 9      | 372   | 237.8    | 0       | 372          |
| 10     | 603   | 59.4     | 0       | 603          |
| 11     | 453   | 14.9     | 0       | 453          |
| 12     | 640   | 3.7      | 0       | 640          |
| 13     | 124   | 0.9      | 0       | 124          |
| 14     | 307   | 0.2      | 0       | 307          |
| 15     | 1484  | 0.1      | 0       | 1484         |
| 16     | 1131  | 0.0      | 0       | 1131         |
| 17     | 1419  | 0.0      | 0       | 1419         |
| 18     | 653   | 0.0      | 0       | 653          |
| 19     | 3507  | 0.0      | 0       | 3507         |
| 20     | 1922  | 0.0      | 0       | 1922         |
| 21     | 7440  | 0.0      | 0       | 7440         |
| 22     | 5714  | 0.0      | 0       | 5714         |
| 23     | 12998 | 0.0      | 0       | 12998        |
| 24     | 50732 | 0.0      | 0       | 50732        |

*Continued in the next page*

|    |          |     |   |          |
|----|----------|-----|---|----------|
| 25 | 117156   | 0.0 | 0 | 117156   |
| 26 | 155802   | 0.0 | 0 | 155802   |
| 27 | 289944   | 0.0 | 0 | 289944   |
| 28 | 264827   | 0.0 | 0 | 264827   |
| 29 | 419351   | 0.0 | 0 | 419351   |
| 30 | 24098522 | 0.0 | 0 | 24098522 |
| 31 | 877221   | 0.0 | 0 | 877221   |
| 32 | 58377    | 0.0 | 0 | 58377    |
| 33 | 3779     | 0.0 | 0 | 3779     |
| 34 | 468      | 0.0 | 0 | 468      |
| 35 | 265      | 0.0 | 0 | 265      |
| 36 | 212      | 0.0 | 0 | 212      |
| 37 | 332      | 0.0 | 0 | 332      |
| 38 | 253      | 0.0 | 0 | 253      |
| 39 | 489      | 0.0 | 0 | 489      |
| 40 | 332      | 0.0 | 0 | 332      |
| 41 | 334      | 0.0 | 0 | 334      |
| 42 | 805      | 0.0 | 0 | 805      |
| 43 | 260      | 0.0 | 0 | 260      |
| 44 | 386      | 0.0 | 0 | 386      |
| 45 | 634      | 0.0 | 0 | 634      |
| 46 | 355      | 0.0 | 0 | 355      |
| 47 | 534      | 0.0 | 0 | 534      |
| 48 | 334      | 0.0 | 0 | 334      |
| 49 | 526      | 0.0 | 0 | 526      |
| 50 | 335      | 0.0 | 0 | 335      |
| 51 | 133      | 0.0 | 0 | 133      |
| 52 | 149      | 0.0 | 0 | 149      |
| 53 | 249      | 0.0 | 0 | 249      |
| 54 | 118      | 0.0 | 0 | 118      |
| 55 | 654      | 0.0 | 0 | 654      |
| 56 | 103      | 0.0 | 0 | 103      |
| 57 | 11       | 0.0 | 0 | 11       |
| 58 | 5        | 0.0 | 0 | 5        |
| 59 | 3        | 0.0 | 0 | 3        |
| 60 | 2        | 0.0 | 0 | 2        |
| 62 | 2        | 0.0 | 0 | 2        |
| 64 | 11       | 0.0 | 0 | 11       |
| 65 | 1        | 0.0 | 0 | 1        |
| 66 | 7        | 0.0 | 0 | 7        |
| 67 | 1        | 0.0 | 0 | 1        |
| 68 | 3        | 0.0 | 0 | 3        |
| 72 | 1        | 0.0 | 0 | 1        |
| 73 | 1        | 0.0 | 0 | 1        |
| 80 | 1        | 0.0 | 0 | 1        |
| 82 | 1        | 0.0 | 0 | 1        |
| 95 | 1        | 0.0 | 0 | 1        |

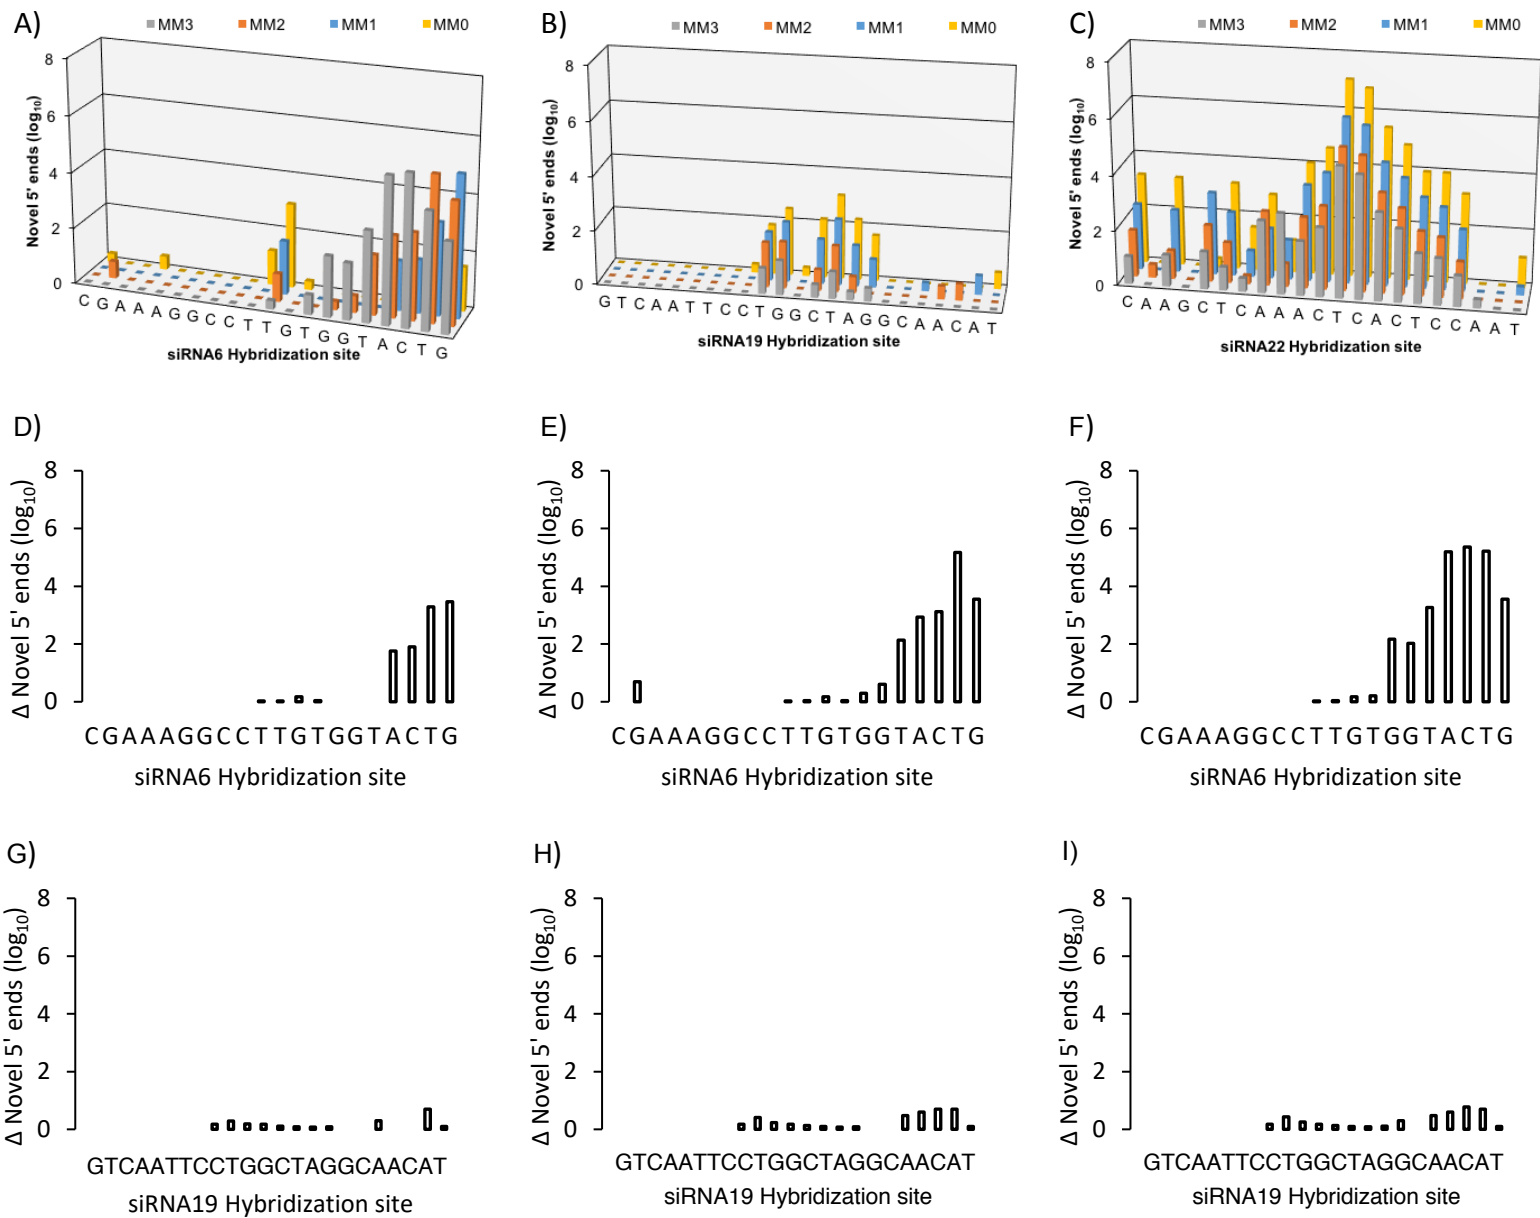

**Supplemental Figure 2:** Changes in 5'-RACE-SEQ product profiles at increasing levels of random mismatch tolerance during data alignment to the corresponding target sequence. The incremental increases in novel 5' end counts when accepting progressively more (MM0-MM3) mismatches are plotted for siRNA6 (A), siRNA19 (B) and siRNA22 (C), synthetic siRNA analogues to the anti-HCV shRNA encoded in TT-034. The log-scale changes in novel 5' profiles generated under 1 (D, G), 2 (E, H) or 3 (F, I) maximum random mismatches are displayed for the synthetic analogs of the anti-HCV-encoded TT-034 siRNA6 (A-C) and siRNA19 (D-F).

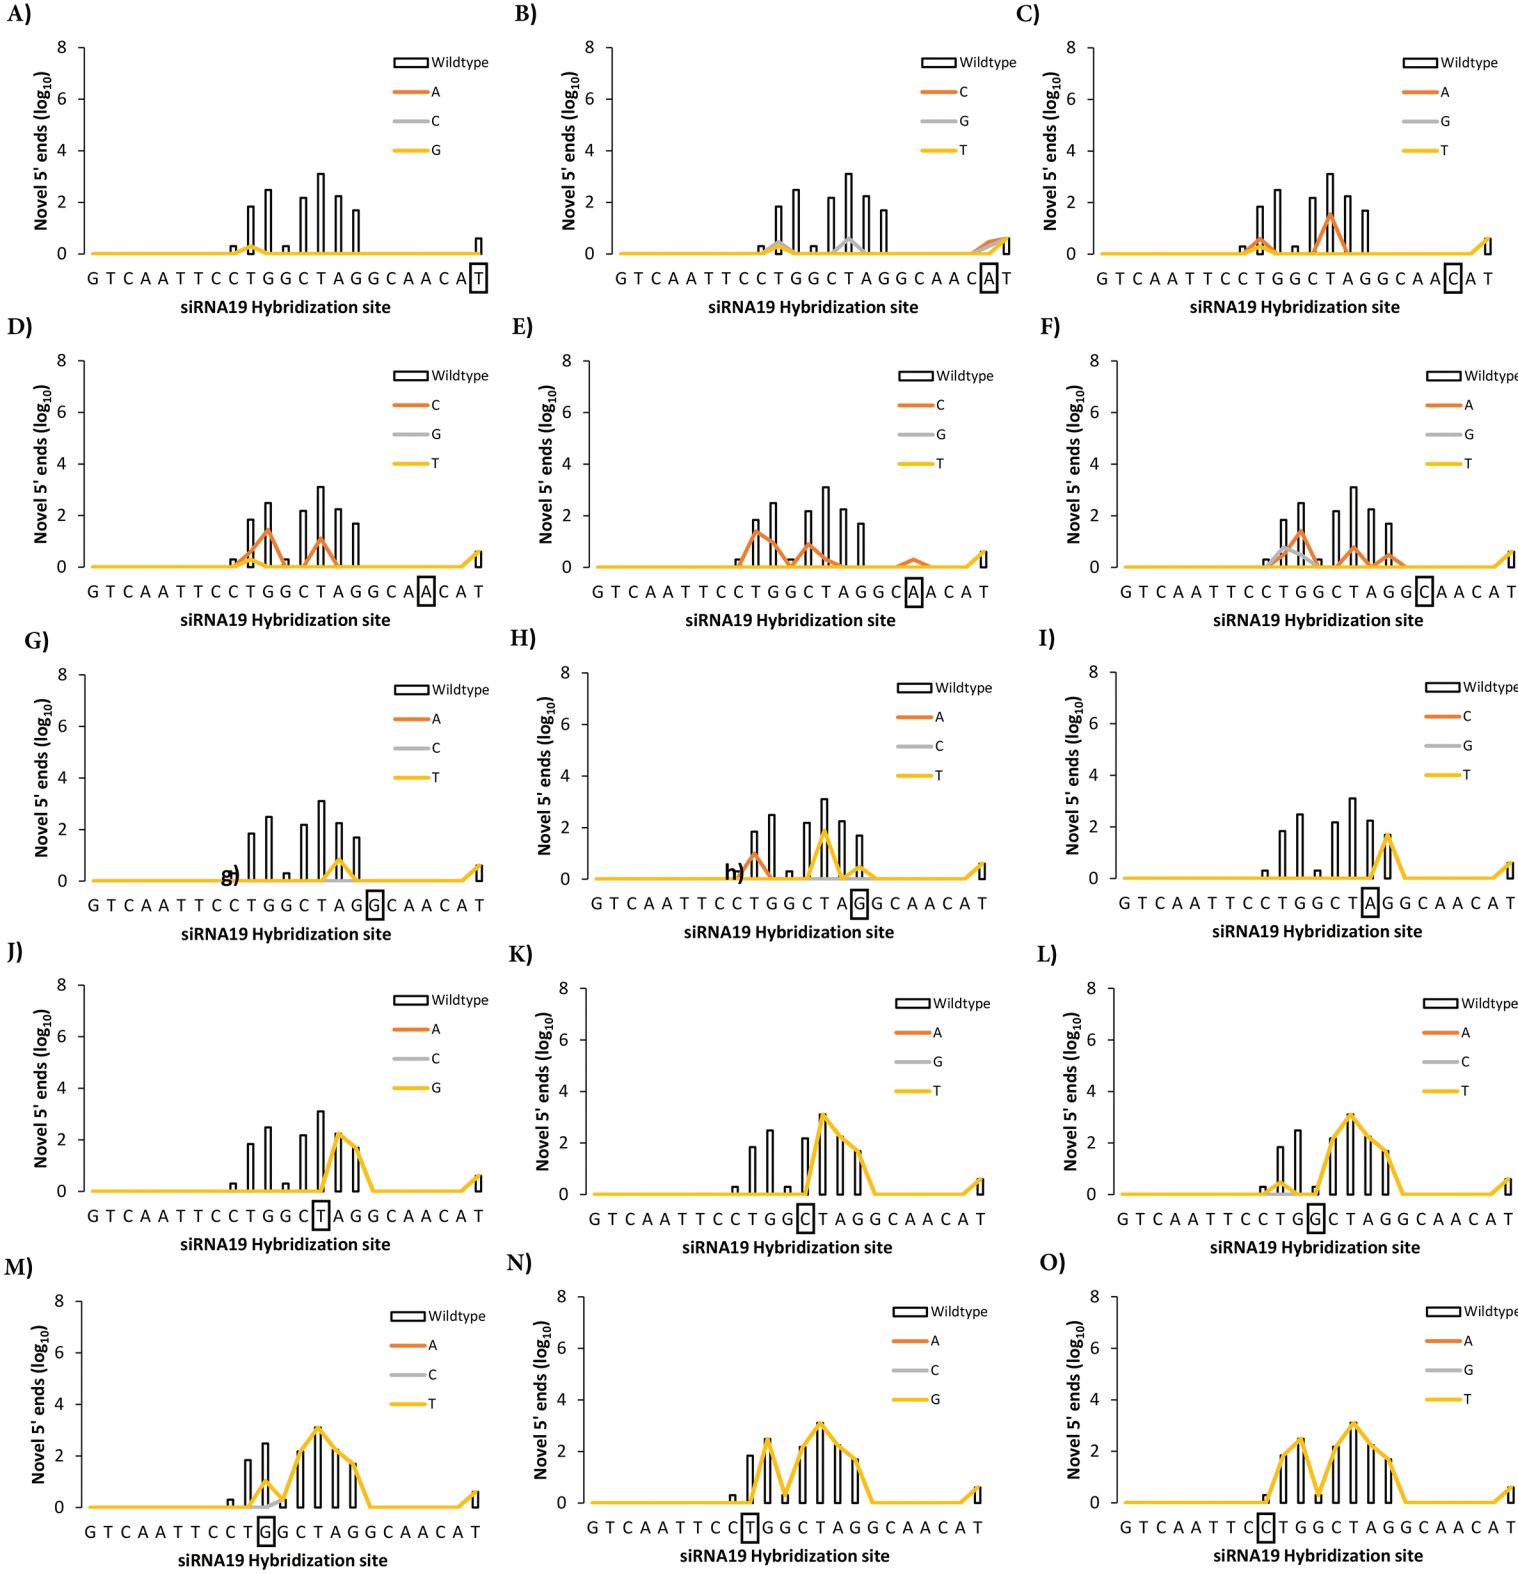

**Supplemental Figure 3.** Effect of specific nucleotide substitutions on RACE-SEQ profiles across the 15 Watson-Crick pairing positions from the 5' end of the siRNA 19 guide strand directed against the Con1B HCV replicon. A boxed nucleotide on the X axis highlights the base substituted within each panel. A differentially coloured line represents the effect of each possible base substitution within the boxed base.

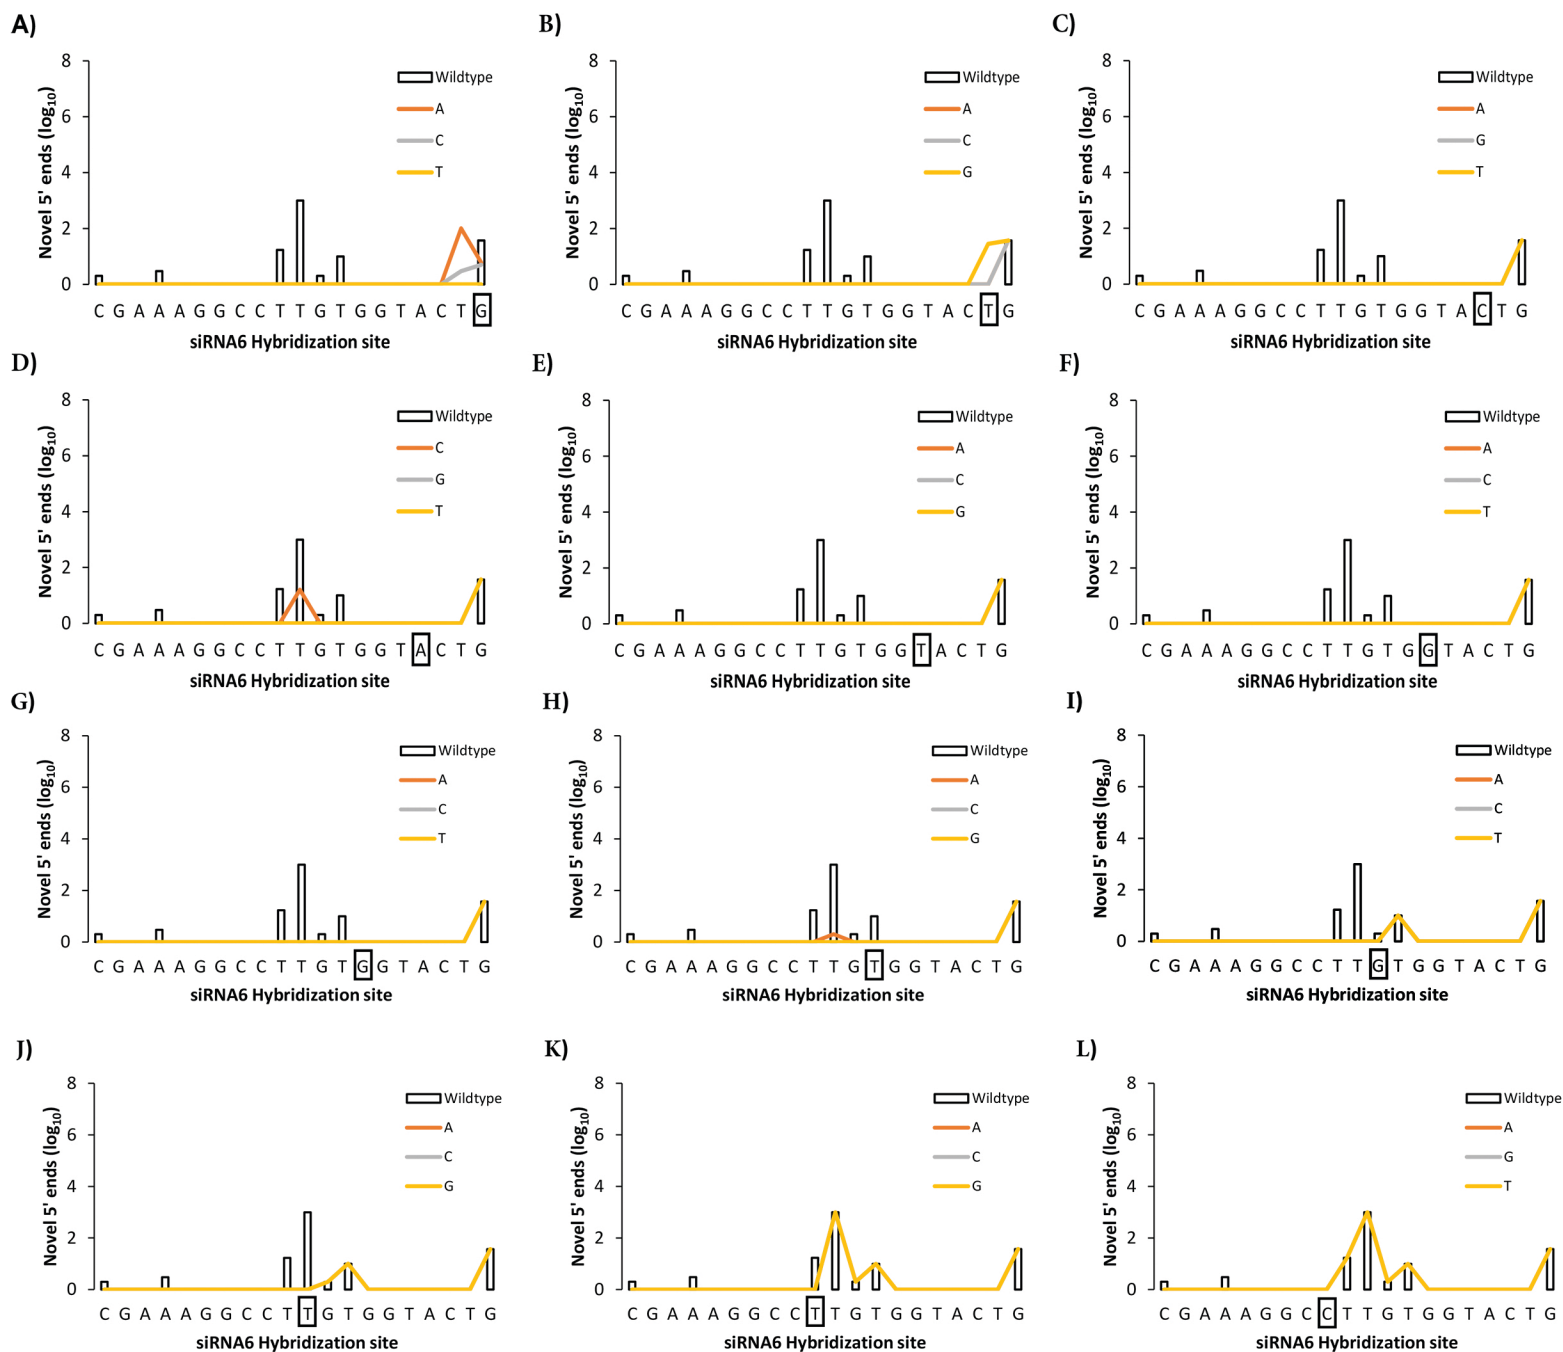

**Supplemental Figure 4.** Effect of specific nucleotide substitutions on RACE-SEQ profiles across the 12 Watson-Crick pairing positions from the 5' end of the siRNA 6 guide strand directed against the Con1B HCV replicon. A boxed nucleotide on the X axis highlights the base substituted within each panel. A differentially coloured line represents the effect of each possible base substitution within the boxed base.

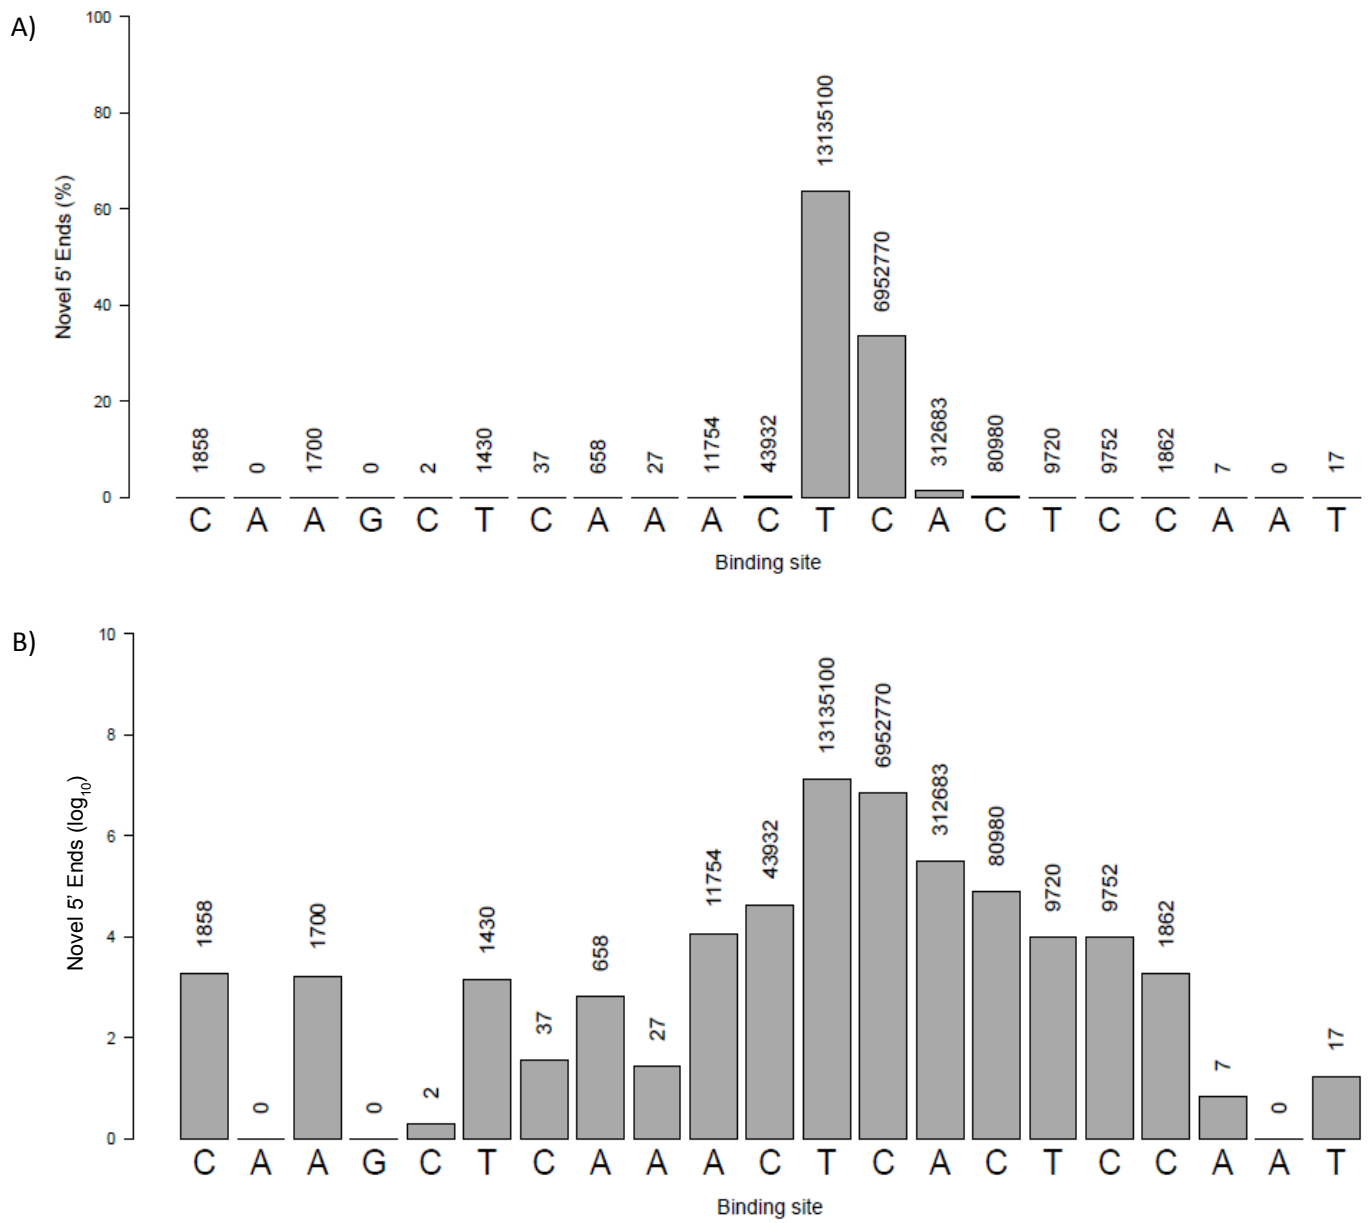

**Supplemental Figure 5.** Sample output of the RACE-SEQ lite pipeline processing 5'-RACE SEQ data.



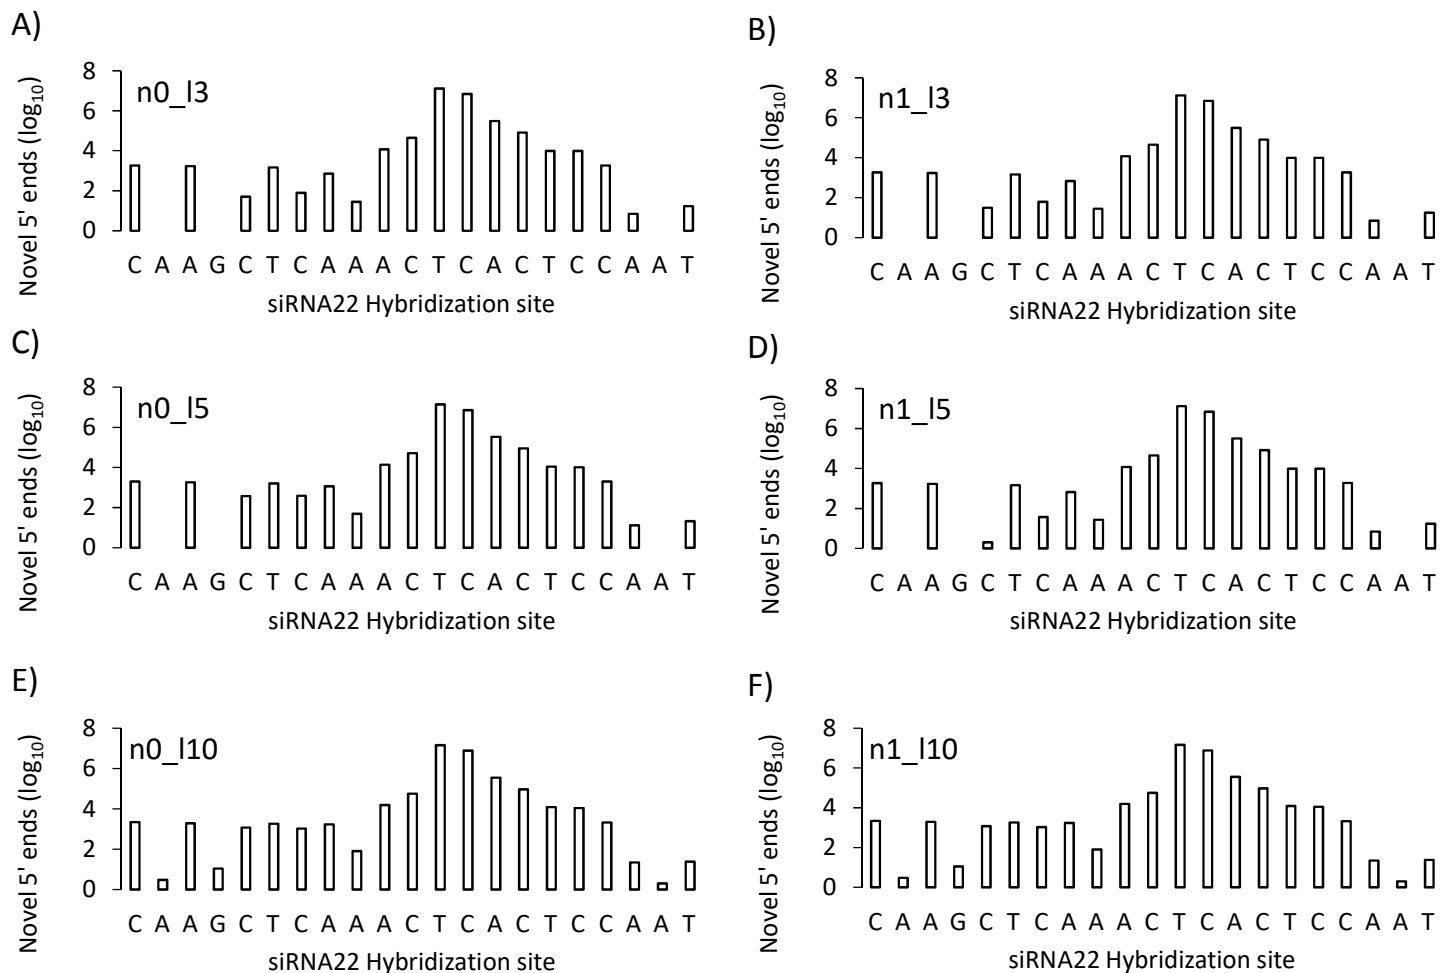

**Supplemental Figure 6.** Impact of Bowtie2 seed substring length parameter adjustment on RACE-SEQ data outputs highlights the incompatibility of this aligner with RACE-SEQ data processing. As Bowtie2 uses substrings of a read to map faster reads onto a reference genome, we explored the effect of substring length of 3 (A, B), 5 (C, D) and 10 (E, F) nucleotides with no (A, C, E) or one (B, D, F) mismatch permitted during alignment for the RACE-SEQ products of the TT-034-encoded siRNA22. The parameter specification is represented in each panel with -n identifying the number of mismatches and -l the seed length.

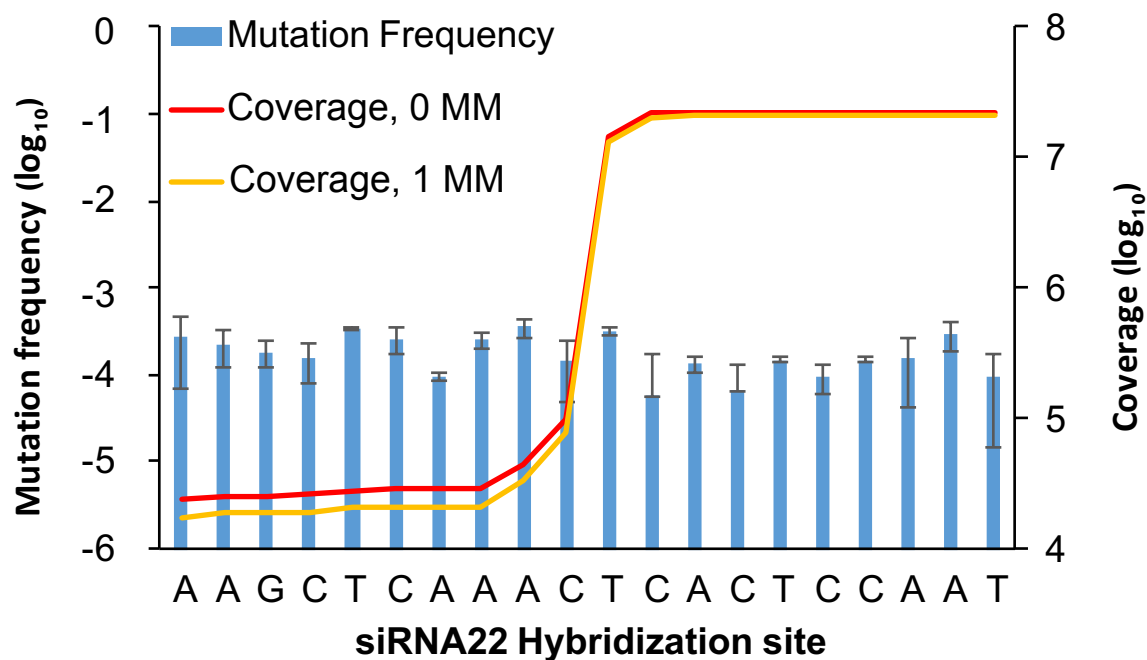

**Supplemental Figure 7: Per base coverage in replicon systems defines RACE-SEQ sensitivity to quasi-species susceptibility to slicer cleavage.** The per-base mutation frequency of HCV replicons (primary Y axis) across the siRNA22 target site (X axis) was reported as 1:1,000 to 1:10,000 by Geller *et al.*,<sup>44</sup> setting a 4 log per base coverage threshold for effective detection of HCV quasi-species. Whilst coverage of the siRNA22 hybridization site exceeds this threshold, the 5' sensitivity of 5' RACE-SEQ results in greater coverage (secondary Y axis) downstream from the primary slicer cleavage point (scissors). Coverage is also not substantially increased by permitting 1 mismatch (MM) in 5' RACE-SEQ read alignment to the reference genome; together with the  $8.4 \times 10^{-8}$  per base error rate in duplex sequencing used to generate this data, these mismatches are likely the outcome of quasi species sequencing and not PCR/SEQ error propagation.
